# Supplementary material for: MicroRNA-411 Downregulation Enhances Tumor Growth by Upregulating MLLT11 Expression in Human Bladder Cancer
Source: PubMed Central journal article supplement — Mol Ther Nucleic Acids. 2018 Mar 10;11:312–22. doi: 10.1016/j.omtn.2018.03.003 (PMC5889700; doi:10.1016/j.omtn.2018.03.003), 2018-03-10
Supplement: mmc1.pdf [file mmc1.pdf]

OMTN, Volume 11

## **Supplemental Information**

### **MicroRNA-411 Downregulation Enhances Tumor Growth by Upregulating MLLT11 Expression in Human Bladder Cancer**

**Honglei Jin, Wenrui Sun, Yuanmei Zhang, Huiying Yan, Huating Liufu, Shuai Wang, Caiyi Chen, Jiayan Gu, Xiaohui Hua, Lingli Zhou, Guosong Jiang, Dapang Rao, Qipeng Xie, Haishan Huang, and Chuanshu Huang**

Figure. S1

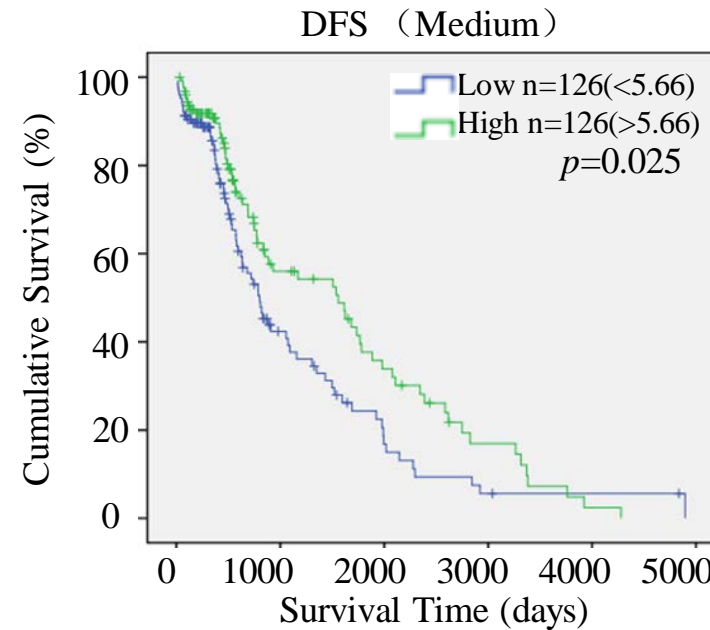

**Kaplan-Meier estimation of disease-free survival (DFS) in bladder cancer (BC) patients from the TCGA database.** Disease free survival (DFS) curves showing that in patients with high miR-411 expression (n=126) tend to associate with better DFS; lower expression of miR-411 (n=126) was associated with shorter survival, so it may be as a marker of poor prognosis in patients with BC.

Figure. S2

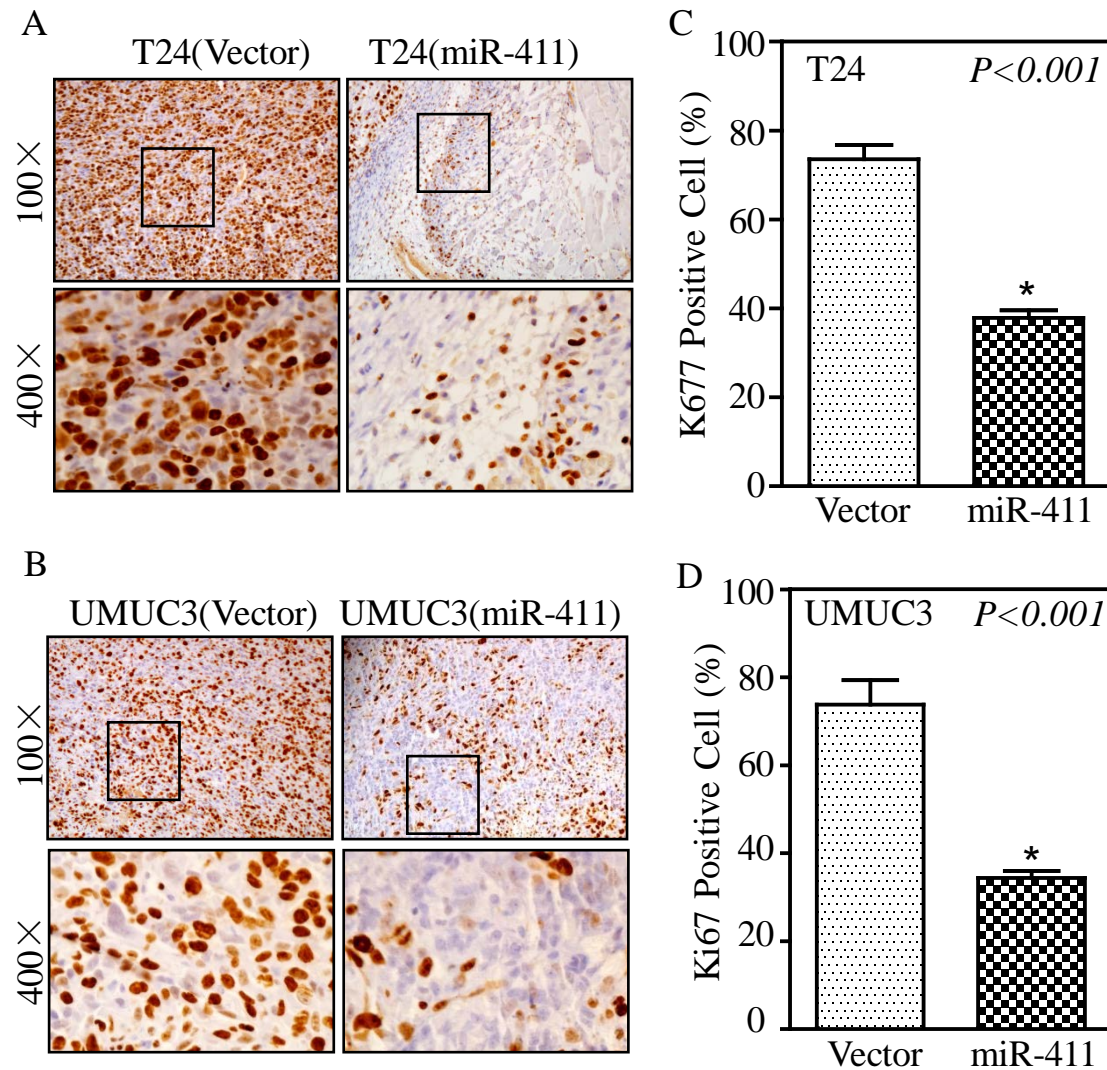

(A & B) Immunohistochemistry (IHC) assays were performed to assess Ki67 expression in BC tissues collected from nude mice as described in Figure 6A. IHC images were captured using the Nikon Eclipse Ni microsystem (Nikon DS-Ri2, Japan). (C & D) Ki67 protein expression levels were analyzed by calculating the integrated IOD/area using Image-Pro Plus version 6.0. Results are presented as the mean  $\pm$  SD from the tissues. The Student's *t*-test was used to determine the *P*-values. The asterisk (\*) indicates a significant decrease compared with the tissues from the vector control group (\**P* < 0.05).

Figure. S3

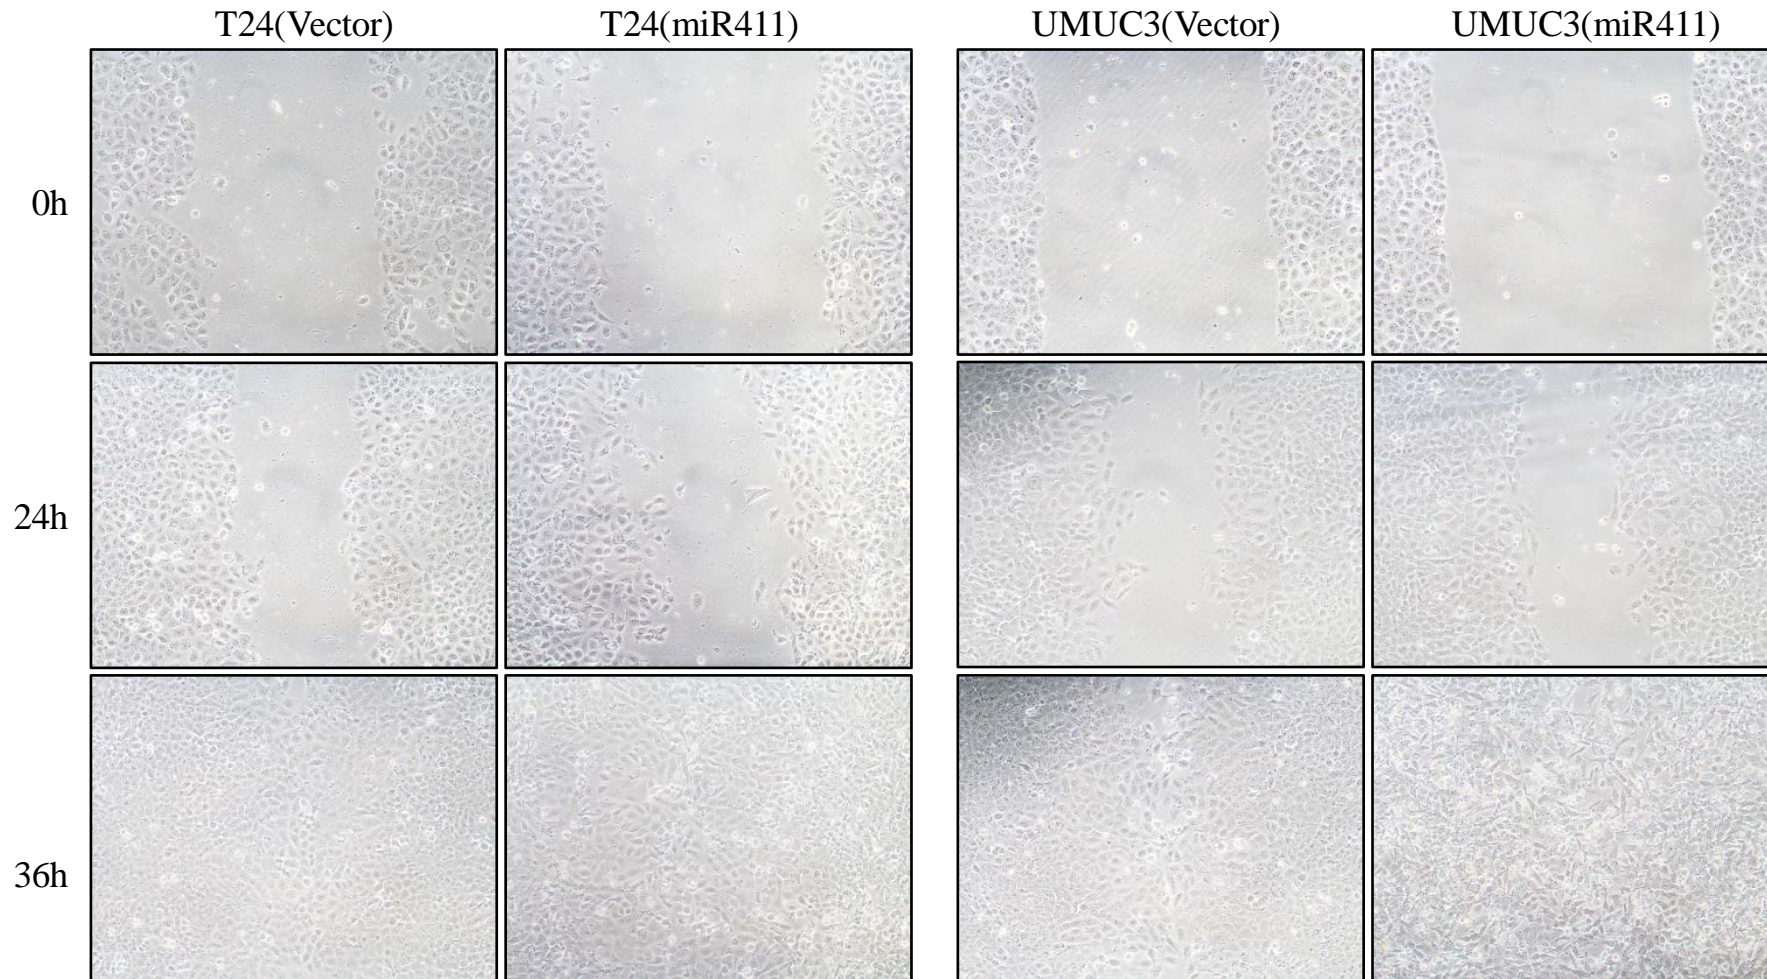

The wound-healing assay was used to assess the effect of miR-411 on the migration of BC cells. T24 (miR-411), UMUC3 (miR-411), and vector control cells were seeded into 6-well plates at  $6 \times 10^5$  cells per well. When cell confluence reached 90–100%, wounds were made using sterile tips. Images were acquired under an inverted microscope at the indicated times. The results showed that miR-411 had no obvious effect on the migration of BC cells.

Table 1. The 19 pairs patients' information including gender, days, the expression of miR-411 in tumor and adjacent tissue from TGCG data base.

| Number       | gender | birth_days_to | death_days_to    | ajcc_pathologic_tumor_stage | tumour miR-411 | noraml miR-411 |
|--------------|--------|---------------|------------------|-----------------------------|----------------|----------------|
| TCGA-BL-A13J | MALE   | -23927        | 81               | Stage IV                    | 16.1098833     | 9.68621836     |
| TCGA-BT-A20N | MALE   | -26456        | 795              | Stage III                   | 13.4517207     | 30.9950393     |
| TCGA-BT-A20Q | MALE   | -26778        | 593              | Stage IV                    | 12.1364648     | 15.2916962     |
| TCGA-BT-A20R | FEMALE | -28987        | 154              | Stage IV                    | 23.5597966     | 73.4015587     |
| TCGA-BT-A20U | FEMALE | -25761        | 263              | Stage III                   | 31.3435686     | 22.6703622     |
| TCGA-BT-A20W | MALE   | -26078        | 254              | Stage II                    | 10.8311577     | 51.689674      |
| TCGA-BT-A2LA | MALE   | -20032        | [Not Applicable] | Stage III                   | 1.62326631     | 22.7400318     |
| TCGA-BT-A2LB | FEMALE | -26846        | [Not Applicable] | Stage III                   | 5.4847868      | 17.5174484     |
| TCGA-CU-A0YN | MALE   | -21927        | 393              | Stage III                   | 14.3181775     | 11.2115452     |
| TCGA-CU-A0YR | MALE   | -30674        | [Not Applicable] | Stage IV                    | 4.10612534     | 7.61957182     |
| TCGA-GC-A3BM | MALE   | -25609        | [Not Applicable] | Stage II                    | 2.75374507     | 15.2496704     |
| TCGA-GC-A3WC | FEMALE | -29295        | [Not Applicable] | Stage III                   | 14.6011788     | 13.7484504     |
| TCGA-GC-A6I3 | FEMALE | -32873        | [Not Applicable] | Stage IV                    | 3.14922641     | 18.0853465     |
| TCGA-GD-A2C5 | FEMALE | -19498        | [Not Applicable] | Stage IV                    | 16.4416242     | 43.6814397     |
| TCGA-GD-A3OP | FEMALE | -30956        | [Not Applicable] | Stage IV                    | 19.389785      | 28.8838832     |
| TCGA-GD-A3OQ | MALE   | -17682        | [Not Applicable] | Stage IV                    | 7.22709356     | 23.8788442     |
| TCGA-K4-A3WV | FEMALE | -28444        | [Not Applicable] | Stage II                    | 5.03676099     | 10.6575936     |
| TCGA-K4-A54R | FEMALE | -21601        | [Not Applicable] | Stage II                    | 3.63193661     | 11.4343729     |
| TCGA-K4-A5RI | MALE   | -24614        | [Not Applicable] | Stage III                   | 5.17100252     | 15.3760964     |

Table 2. The information of bladder cancer patients including case number, gender, age, stage.

| case(NO.#) | gender | age | stage | case(NO.#) | gender | age | stage |
|------------|--------|-----|-------|------------|--------|-----|-------|
| 1#         | male   | 48  | T1    | 18#        | male   | 61  | Tis   |
| 2#         | male   | 61  | T1    | 19#        | male   | 68  | T1    |
| 3#         | male   | 78  | Tis   | 20#        | male   | 60  | Tis   |
| 4#         | male   | 66  | T2b   | 21#        | male   | 54  | T1    |
| 5#         | male   | 70  | T3    | 22#        | male   | 79  | T1    |
| 6#         | male   | 64  | T2b   | 23#        | male   | 53  | T2b   |
| 7#         | male   | 57  | T1    | 24#        | male   | 66  | T2b   |
| 8#         | male   | 60  | T3    | 25#        | male   | 81  | T2b   |
| 9#         | male   | 72  | T2b   | 26#        | male   | 59  | Ta    |
| 10#        | male   | 68  | T1    | 27#        | male   | 57  | Tis   |
| 11#        | male   | 54  | T2b   | 28#        | male   | 61  | T4    |
| 12#        | male   | 57  | T3    | 29#        | male   | 59  | T1    |
| 13#        | male   | 75  | T1    | 30#        | male   | 68  | T4    |
| 14#        | male   | 70  | T2a   | 31#        | male   | 58  | T3    |
| 15#        | female | 65  | T2b   | 32#        | male   | 57  | T1    |
| 16#        | male   | 75  | T1    | 33#        | male   | 58  | Ta    |
| 17#        | female | 74  | T4    |            |        |     |       |
